# Supplementary material for: An ab initio investigation of photoswitches adsorbed onto metal oxide surfaces: the case of donor–acceptor Stenhouse adduct photochromes on TiO2anatase
Source: Royal Society of Chemistry journal article supplement (doi:10.1039/c6tc05297e), 2017-01-01
Supplement: c6tc05297e1.pdf [file c6tc05297e1.pdf]

**ESI for**  
**Ab initio investigation of photoswitches adsorbed onto metal oxide surfaces : the**  
**case of donor-acceptor Stenhouse adduct photochromes on TiO<sub>2</sub> anatase**

A. Belhboub<sup>1</sup>, F. Boucher<sup>2</sup> and D. Jacquemin<sup>1,3</sup>

<sup>1</sup>Laboratoire CEISAM, UMR CNRS 6230, Universite de Nantes, 2 Rue de la Houssiniere, BP 92208, Nantes  
44322 Cedex 3, France

<sup>2</sup>Institut des Materiaux Jean Rouxel, Universite de Nantes, CNRS, 2 Rue de la Houssiniere, BP 32229, Nantes  
44322 Cedex 3, France

<sup>3</sup> Institut Universitaire de France, 1, Rue Descartes, Paris 75231 Cedex 05, France

**Bond lengths**

TABLE 1 – Comparison between the bond lengths of **1a** in the adsorbed and isolated states

| Bond type | Adsorbed-phase (Å) | Gas-phase (Å) | Difference (Å) |
|-----------|--------------------|---------------|----------------|
| C 1 – C 5 | 1.5120             | 1.5138        | 0.1741E-02     |
| C 1 – C 6 | 1.5235             | 1.5242        | 0.7765E-03     |
| C 1 – O41 | 1.4477             | 1.4472        | 0.5195E-03     |
| C 1 – O42 | 1.4647             | 1.4624        | 0.2270E-02     |
| C 2 – C 3 | 1.4504             | 1.4491        | 0.1348E-02     |
| C 2 – O39 | 1.2706             | 1.2698        | 0.7724E-03     |
| C 2 – O42 | 1.3719             | 1.3768        | 0.4886E-02     |
| C 3 – C 4 | 1.4746             | 1.4731        | 0.1477E-02     |
| C 3 – C 7 | 1.4018             | 1.4045        | 0.2667E-02     |
| C 4 – O40 | 1.2490             | 1.2497        | 0.7021E-03     |
| C 4 – O41 | 1.3915             | 1.3937        | 0.2236E-02     |
| C 5 – H18 | 1.0993             | 1.0996        | 0.2583E-03     |
| C 5 – H19 | 1.0993             | 1.0995        | 0.1202E-03     |
| C 5 – H20 | 1.0988             | 1.0989        | 0.4583E-04     |
| C 6 – H21 | 1.1007             | 1.1005        | 0.1657E-03     |
| C 6 – H22 | 1.0996             | 1.0999        | 0.3178E-03     |
| C 6 – H23 | 1.0996             | 1.0997        | 0.1276E-03     |
| C 7 – C 8 | 1.4145             | 1.4151        | 0.5331E-03     |
| C 7 – H24 | 1.0947             | 1.0947        | 0.5448E-04     |
| C 8 – C 9 | 1.4093             | 1.4046        | 0.4723E-02     |
| C 8 – O43 | 1.3594             | 1.3647        | 0.5285E-02     |
| C 9 – C10 | 1.4004             | 1.4086        | 0.8223E-02     |
| C 9 – H25 | 1.0938             | 1.0939        | 0.1639E-03     |
| C10 – C11 | 1.3890             | 1.3842        | 0.4733E-02     |
| C10 – H26 | 1.0921             | 1.0925        | 0.4647E-03     |
| C11 – N17 | 1.3488             | 1.3596        | 0.1089E-01     |
| C11 – H27 | 1.0958             | 1.0958        | 0.1626E-04     |
| C12 – C13 | 1.5283             | 1.5302        | 0.1912E-02     |
| C12 – N17 | 1.4666             | 1.4664        | 0.2076E-03     |
| C12 – H28 | 1.1024             | 1.1023        | 0.1688E-03     |
| C12 – H29 | 1.1005             | 1.1020        | 0.1560E-02     |
| C13 – H30 | 1.1015             | 1.1016        | 0.8073E-04     |
| C13 – H31 | 1.1004             | 1.1011        | 0.7082E-03     |
| C13 – H32 | 1.1004             | 1.1004        | 0.2464E-05     |
| C14 – C15 | 1.5377             | 1.5493        | 0.1165E-01     |
| C14 – N17 | 1.4588             | 1.4563        | 0.2478E-02     |
| C14 – H33 | 1.1025             | 1.1032        | 0.7319E-03     |
| C14 – H34 | 1.1003             | 1.1009        | 0.5797E-03     |
| C15 – C16 | 1.5054             | 1.5057        | 0.3774E-03     |
| C15 – H35 | 1.1000             | 1.0995        | 0.4331E-03     |
| C15 – H36 | 1.1000             | 1.1000        | 0.2340E-04     |
| C16 – O44 | 1.2973             | 1.3787        | 0.8144E-01     |
| C16 – O45 | 1.2964             | 1.2466        | 0.4980E-01     |
| H37 – O43 | 1.0478             | 1.0414        | 0.6425E-02     |

TABLE 2 – Comparison between the bond lengths of **2a** in the adsorbed and isolated states

| Bond type | Adsorbed-phase (Å) | Gas-phase (Å) | Difference (Å) |
|-----------|--------------------|---------------|----------------|
| C 1 – C 2 | 1.5141             | 1.5155        | 0.1364E-02     |
| C 1 – H18 | 1.0991             | 1.0991        | 0.6112E-04     |
| C 1 – H19 | 1.0996             | 1.0999        | 0.2572E-03     |
| C 1 – H20 | 1.0995             | 1.0998        | 0.2453E-03     |
| C 2 – C 3 | 1.5256             | 1.5278        | 0.2146E-02     |
| C 2 – O39 | 1.4601             | 1.4579        | 0.2146E-02     |
| C 2 – O40 | 1.4613             | 1.4605        | 0.8031E-03     |
| C 3 – H21 | 1.1001             | 1.1005        | 0.4037E-03     |
| C 3 – H22 | 1.1000             | 1.1006        | 0.5439E-03     |
| C 3 – H23 | 1.1002             | 1.0994        | 0.8180E-03     |
| C 4 – C 5 | 1.4242             | 1.4155        | 0.8730E-02     |
| C 4 – O40 | 1.3937             | 1.3998        | 0.6146E-02     |
| C 4 – O42 | 1.2702             | 1.2750        | 0.4887E-02     |
| C 5 – C 6 | 1.4253             | 1.4180        | 0.7270E-02     |
| C 5 – C 7 | 1.4873             | 1.4895        | 0.2190E-02     |
| C 6 – O39 | 1.3941             | 1.4007        | 0.6591E-02     |
| C 6 – O41 | 1.2677             | 1.2705        | 0.2861E-02     |
| C 7 – C 8 | 1.5492             | 1.5437        | 0.5474E-02     |
| C 7 – C11 | 1.5405             | 1.5411        | 0.6121E-03     |
| C 7 – H24 | 1.1067             | 1.1070        | 0.3728E-03     |
| C 8 – C 9 | 1.4806             | 1.4825        | 0.1852E-02     |
| C 8 – O43 | 1.2480             | 1.2491        | 0.1147E-02     |
| C 9 – C10 | 1.3484             | 1.3493        | 0.8771E-03     |
| C 9 – H25 | 1.0900             | 1.0903        | 0.3121E-03     |
| C10 – C11 | 1.5027             | 1.5019        | 0.7801E-03     |
| C10 – H26 | 1.0941             | 1.0947        | 0.5965E-03     |
| C11 – N17 | 1.5247             | 1.5284        | 0.3783E-02     |
| C11 – H36 | 1.1039             | 1.1048        | 0.9165E-03     |
| C12 – C13 | 1.5185             | 1.5175        | 0.1019E-02     |
| C12 – N17 | 1.5218             | 1.5231        | 0.1325E-02     |
| C12 – H27 | 1.1044             | 1.1072        | 0.2718E-02     |
| C12 – H28 | 1.1009             | 1.1013        | 0.4063E-03     |
| C13 – H29 | 1.0999             | 1.0997        | 0.1864E-03     |
| C13 – H30 | 1.1003             | 1.1002        | 0.9505E-04     |
| C13 – H31 | 1.1041             | 1.1047        | 0.5789E-03     |
| C14 – C15 | 1.5240             | 1.5244        | 0.4289E-03     |
| C14 – N17 | 1.5154             | 1.5113        | 0.4163E-02     |
| C14 – H32 | 1.0985             | 1.0991        | 0.6227E-03     |
| C14 – H33 | 1.0987             | 1.0984        | 0.3923E-03     |
| C15 – C16 | 1.5222             | 1.5122        | 0.1001E-01     |
| C15 – H34 | 1.1033             | 1.1026        | 0.7317E-03     |
| C15 – H35 | 1.1052             | 1.1058        | 0.5442E-03     |
| C16 – O44 | 1.2930             | 1.3715        | 0.7848E-01     |
| C16 – O45 | 1.2944             | 1.2448        | 0.4964E-01     |
| N17 – H37 | 1.0400             | 1.0404        | 0.3667E-03     |

TABLE 3 – Comparison between the bond lengths of **1b** in the adsorbed and isolated states

| Bond type | Adsorbed-phase (Å) | Gas-phase (Å) | Difference (Å) |
|-----------|--------------------|---------------|----------------|
| C 1 – N18 | 1.3908             | 1.3904        | 0.4017E-03     |
| C 1 – N19 | 1.4065             | 1.4044        | 0.2077E-02     |
| C 1 – O44 | 1.2581             | 1.2594        | 0.1317E-02     |
| C 2 – C 3 | 1.4460             | 1.4440        | 0.1992E-02     |
| C 2 – N19 | 1.3913             | 1.3940        | 0.2698E-02     |
| C 2 – O41 | 1.2875             | 1.2868        | 0.7273E-03     |
| C 3 – C 4 | 1.4724             | 1.4691        | 0.3334E-02     |
| C 3 – C 5 | 1.4041             | 1.4049        | 0.7395E-03     |
| C 4 – N18 | 1.4099             | 1.4114        | 0.1493E-02     |
| C 4 – O42 | 1.2647             | 1.2658        | 0.1105E-02     |
| C 5 – C 6 | 1.4172             | 1.4150        | 0.2206E-02     |
| C 5 – H20 | 1.0949             | 1.0948        | 0.1284E-03     |
| C 6 – C 7 | 1.4142             | 1.4058        | 0.8383E-02     |
| C 6 – O43 | 1.3574             | 1.3626        | 0.5159E-02     |
| C 7 – C 8 | 1.4025             | 1.4086        | 0.6011E-02     |
| C 7 – H21 | 1.0939             | 1.0938        | 0.4772E-04     |
| C 8 – C 9 | 1.3944             | 1.3843        | 0.1012E-01     |
| C 8 – H22 | 1.0926             | 1.0925        | 0.3404E-04     |
| C 9 – N17 | 1.3524             | 1.3600        | 0.7597E-02     |
| C 9 – H23 | 1.0955             | 1.0957        | 0.1545E-03     |
| C10 – C11 | 1.5304             | 1.5304        | 0.3089E-04     |
| C10 – N17 | 1.4706             | 1.4659        | 0.4665E-02     |
| C10 – H24 | 1.1008             | 1.1023        | 0.1522E-02     |
| C10 – H25 | 1.1023             | 1.1020        | 0.2524E-03     |
| C11 – H26 | 1.1010             | 1.1016        | 0.5879E-03     |
| C11 – H27 | 1.1012             | 1.1011        | 0.9383E-04     |
| C11 – H28 | 1.1005             | 1.1004        | 0.8297E-04     |
| C12 – C13 | 1.5521             | 1.5493        | 0.2762E-02     |
| C12 – N17 | 1.4673             | 1.4558        | 0.1153E-01     |
| C12 – H29 | 1.1028             | 1.1032        | 0.3966E-03     |
| C12 – H30 | 1.1009             | 1.1010        | 0.5945E-04     |
| C13 – C16 | 1.5175             | 1.5056        | 0.1195E-01     |
| C13 – H31 | 1.1003             | 1.0999        | 0.3371E-03     |
| C13 – H32 | 1.0998             | 1.0997        | 0.8589E-04     |
| C14 – N18 | 1.4700             | 1.4690        | 0.1066E-02     |
| C14 – H34 | 1.0995             | 1.0996        | 0.1139E-03     |
| C14 – H35 | 1.0993             | 1.0994        | 0.3508E-04     |
| C14 – H36 | 1.0959             | 1.0960        | 0.1043E-03     |
| C15 – N19 | 1.4705             | 1.4695        | 0.1028E-02     |
| C15 – H37 | 1.0957             | 1.0958        | 0.2062E-04     |
| C15 – H38 | 1.0992             | 1.0993        | 0.1399E-03     |
| C15 – H39 | 1.0991             | 1.0992        | 0.1182E-03     |
| C16 – O45 | 1.2997             | 1.3782        | 0.7849E-01     |
| C16 – O46 | 1.2969             | 1.2469        | 0.4998E-01     |
| H33 – O43 | 1.0556             | 1.0483        | 0.7320E-02     |

TABLE 4 – Comparison between the bond lengths of **2b** in the adsorbed and isolated states

| Bond type | Adsorbed-phase (Å) | Gas-phase (Å) | Difference (Å) |
|-----------|--------------------|---------------|----------------|
| C 1 – N18 | 1.3954             | 1.3937        | 0.1722E-02     |
| C 1 – N19 | 1.3969             | 1.3953        | 0.1561E-02     |
| C 1 – O44 | 1.2625             | 1.2650        | 0.2518E-02     |
| C 2 – C 3 | 1.4199             | 1.4119        | 0.7927E-02     |
| C 2 – N19 | 1.4125             | 1.4178        | 0.5331E-02     |
| C 2 – O42 | 1.2863             | 1.2916        | 0.5293E-02     |
| C 3 – C 4 | 1.4212             | 1.4154        | 0.5751E-02     |
| C 3 – C 5 | 1.4865             | 1.4893        | 0.2797E-02     |
| C 4 – N18 | 1.4119             | 1.4168        | 0.4981E-02     |
| C 4 – O41 | 1.2824             | 1.2857        | 0.3334E-02     |
| C 5 – C 6 | 1.5493             | 1.5451        | 0.4281E-02     |
| C 5 – C 9 | 1.5392             | 1.5396        | 0.3628E-03     |
| C 5 – H20 | 1.1059             | 1.1072        | 0.1275E-02     |
| C 6 – C 7 | 1.4819             | 1.4847        | 0.2735E-02     |
| C 6 – O43 | 1.2465             | 1.2479        | 0.1384E-02     |
| C 7 – C 8 | 1.3475             | 1.3478        | 0.2625E-03     |
| C 7 – H21 | 1.0901             | 1.0904        | 0.2482E-03     |
| C 8 – C 9 | 1.5040             | 1.5030        | 0.9136E-03     |
| C 8 – H22 | 1.0941             | 1.0947        | 0.5973E-03     |
| C 9 – N17 | 1.5274             | 1.5318        | 0.4435E-02     |
| C 9 – H32 | 1.1028             | 1.1031        | 0.2476E-03     |
| C10 – C11 | 1.5167             | 1.5177        | 0.1021E-02     |
| C10 – N17 | 1.5206             | 1.5220        | 0.1451E-02     |
| C10 – H23 | 1.1047             | 1.1081        | 0.3364E-02     |
| C10 – H24 | 1.0995             | 1.1012        | 0.1747E-02     |
| C11 – H25 | 1.0994             | 1.0995        | 0.3305E-04     |
| C11 – H26 | 1.1004             | 1.1003        | 0.6180E-04     |
| C11 – H27 | 1.1040             | 1.1046        | 0.6164E-03     |
| C12 – C13 | 1.5214             | 1.5250        | 0.3565E-02     |
| C12 – N17 | 1.5140             | 1.5116        | 0.2327E-02     |
| C12 – H28 | 1.0990             | 1.0989        | 0.6711E-04     |
| C12 – H29 | 1.0978             | 1.0982        | 0.3891E-03     |
| C13 – C16 | 1.5163             | 1.5127        | 0.3583E-02     |
| C13 – H30 | 1.1013             | 1.1027        | 0.1371E-02     |
| C13 – H31 | 1.1062             | 1.1057        | 0.4424E-03     |
| C14 – N18 | 1.4652             | 1.4642        | 0.9922E-03     |
| C14 – H34 | 1.1003             | 1.1009        | 0.5287E-03     |
| C14 – H35 | 1.0995             | 1.1002        | 0.6535E-03     |
| C14 – H36 | 1.0969             | 1.0971        | 0.1871E-03     |
| C15 – N19 | 1.4657             | 1.4640        | 0.1685E-02     |
| C15 – H37 | 1.0996             | 1.1003        | 0.7057E-03     |
| C15 – H38 | 1.1004             | 1.1008        | 0.4021E-03     |
| C15 – H39 | 1.0966             | 1.0968        | 0.1291E-03     |
| C16 – O45 | 1.2938             | 1.3713        | 0.7751E-01     |
| C16 – O46 | 1.2928             | 1.2446        | 0.4814E-01     |
| N17 – H33 | 1.0402             | 1.0403        | 0.8908E-04     |

## Angles

TABLE 5 – Comparison between the angles of **1a** in the adsorbed and isolated states

| Angle           | Adsorbed-phase (°) | Gas-phase (°) | Difference (°) |
|-----------------|--------------------|---------------|----------------|
| C 1 – C 6 – C 5 | 113.9241           | 113.7006      | 0.22           |
| C 1 – O41 – C 5 | 106.7144           | 106.5737      | 0.14           |
| C 1 – O41 – C 6 | 110.2590           | 110.2936      | 0.03           |
| C 1 – O42 – C 5 | 106.0650           | 106.2389      | 0.17           |
| C 1 – O42 – C 6 | 109.2761           | 109.3492      | 0.07           |
| C 1 – O42 – O41 | 110.5028           | 110.5911      | 0.08           |
| C 2 – O39 – C 3 | 126.3706           | 126.4905      | 0.11           |
| C 2 – O42 – C 3 | 118.1063           | 118.0817      | 0.02           |
| C 2 – O42 – O39 | 115.4663           | 115.3605      | 0.10           |
| C 3 – C 4 – C 2 | 119.1885           | 119.1462      | 0.04           |
| C 3 – C 7 – C 2 | 125.1332           | 125.2018      | 0.06           |
| C 3 – C 7 – C 4 | 115.5059           | 115.4480      | 0.05           |
| C 4 – O40 – C 3 | 125.2631           | 125.5258      | 0.26           |
| C 4 – O41 – C 3 | 116.6869           | 116.8496      | 0.16           |
| C 4 – O41 – O40 | 117.9734           | 117.5534      | 0.42           |
| C 5 – H18 – C 1 | 109.2268           | 109.2139      | 0.01           |
| C 5 – H19 – C 1 | 109.5002           | 109.5951      | 0.09           |
| C 5 – H19 – H18 | 109.4368           | 109.4039      | 0.03           |
| C 5 – H20 – C 1 | 109.7675           | 109.7632      | 0.00           |
| C 5 – H20 – H18 | 109.3869           | 109.3318      | 0.05           |
| C 5 – H20 – H19 | 109.5086           | 109.5185      | 0.00           |
| C 6 – H21 – C 1 | 110.5784           | 110.4995      | 0.07           |
| C 6 – H22 – C 1 | 109.5924           | 109.5311      | 0.06           |
| C 6 – H22 – H21 | 109.1183           | 109.1069      | 0.01           |
| C 6 – H23 – C 1 | 109.1613           | 109.2668      | 0.10           |
| C 6 – H23 – H21 | 108.9218           | 109.0059      | 0.08           |
| C 6 – H23 – H22 | 109.4502           | 109.4128      | 0.03           |
| C 7 – C 8 – C 3 | 132.6994           | 133.1778      | 0.47           |
| C 7 – H24 – C 3 | 113.0388           | 112.7360      | 0.30           |
| C 7 – H24 – C 8 | 114.2617           | 114.0863      | 0.17           |
| C 8 – C 9 – C 7 | 117.2070           | 117.0091      | 0.19           |
| C 8 – O43 – C 7 | 125.2079           | 125.0397      | 0.16           |
| C 8 – O43 – C 9 | 117.5787           | 117.9499      | 0.37           |
| C 9 – C10 – C 8 | 123.7737           | 124.3903      | 0.61           |
| C 9 – H25 – C 8 | 116.9710           | 116.7533      | 0.21           |
| C 9 – H25 – C10 | 119.2452           | 118.8559      | 0.38           |
| C10 – C11 – C 9 | 120.5950           | 120.9806      | 0.38           |
| C10 – H26 – C 9 | 118.0189           | 117.7167      | 0.30           |
| C10 – H26 – C11 | 121.3514           | 121.3024      | 0.04           |
| C11 – N17 – C10 | 126.8038           | 127.0497      | 0.24           |
| C11 – H27 – C10 | 118.9712           | 118.8983      | 0.07           |
| C11 – H27 – N17 | 114.2152           | 114.0503      | 0.16           |
| C12 – N17 – C13 | 111.3117           | 112.1114      | 0.79           |
| C12 – H28 – C13 | 110.6834           | 110.5607      | 0.12           |
| C12 – H28 – N17 | 107.2817           | 107.4974      | 0.21           |
| C12 – H29 – C13 | 111.5032           | 110.8117      | 0.69           |
| C12 – H29 – N17 | 108.6818           | 108.4747      | 0.20           |
| C12 – H29 – H28 | 107.1941           | 107.1968      | 0.00           |
| C13 – H30 – C12 | 110.4865           | 110.7858      | 0.29           |
| C13 – H31 – C12 | 110.2787           | 110.1204      | 0.15           |
| C13 – H31 – H30 | 108.1862           | 108.2466      | 0.06           |
| C13 – H32 – C12 | 110.4214           | 110.5230      | 0.10           |
| C13 – H32 – H30 | 108.6100           | 108.5622      | 0.04           |
| C13 – H32 – H31 | 108.7973           | 108.5330      | 0.26           |
| C14 – N17 – C15 | 110.8588           | 111.6744      | 0.81           |
| C14 – H33 – C15 | 109.9351           | 109.4871      | 0.44           |
| C14 – H33 – N17 | 108.7978           | 108.8639      | 0.06           |
| C14 – H34 – C15 | 109.9241           | 109.8126      | 0.11           |
| C14 – H34 – N17 | 109.2329           | 108.9573      | 0.27           |
| C14 – H34 – H33 | 108.0344           | 107.9649      | 0.06           |
| C15 – C16 – C14 | 109.6768           | 110.3842      | 0.70           |
| C15 – H35 – C14 | 110.3046           | 109.4175      | 0.88           |
| C15 – H35 – C16 | 108.8169           | 107.7176      | 1.09           |
| C15 – H36 – C14 | 109.2719           | 108.9623      | 0.30           |
| C15 – H36 – C16 | 108.6851           | 110.5497      | 1.86           |
| C15 – H36 – H35 | 110.0606           | 109.7931      | 0.26           |
| C16 – O44 – C15 | 116.3398           | 111.9072      | 4.43           |
| C16 – O45 – C15 | 116.9552           | 125.3878      | 8.43           |
| C16 – O45 – O44 | 126.6756           | 122.6485      | 4.02           |
| N17 – C12 – C11 | 122.8684           | 121.8433      | 1.02           |
| N17 – C14 – C11 | 120.4156           | 120.6533      | 0.23           |
| N17 – C14 – C12 | 116.7135           | 117.5035      | 0.78           |
| O41 – C 4 – C 1 | 117.7962           | 118.0010      | 0.20           |
| O42 – C 2 – C 1 | 117.8627           | 117.9499      | 0.08           |
| O43 – H37 – C 8 | 108.3562           | 108.1645      | 0.19           |

TABLE 6 – Comparison between the angles of **2a** in the adsorbed and isolated states

| Angle           | Adsorbed-phase (°) | Gas-phase (°) | Difference (°) |
|-----------------|--------------------|---------------|----------------|
| C 1 – H18 – C 2 | 109.8339           | 109.8574      | 0.02           |
| C 1 – H19 – C 2 | 109.3320           | 109.3646      | 0.03           |
| C 1 – H19 – H18 | 109.3799           | 109.3730      | 0.00           |
| C 1 – H20 – C 2 | 109.4589           | 109.4730      | 0.01           |
| C 1 – H20 – H18 | 109.4359           | 109.4209      | 0.01           |
| C 1 – H20 – H19 | 109.3862           | 109.3375      | 0.04           |
| C 2 – C 3 – C 1 | 113.4184           | 112.7449      | 0.67           |
| C 2 – O39 – C 1 | 106.0758           | 106.1818      | 0.10           |
| C 2 – O39 – C 3 | 110.3269           | 110.4602      | 0.13           |
| C 2 – O40 – C 1 | 106.1282           | 106.1117      | 0.01           |
| C 2 – O40 – C 3 | 110.3554           | 110.6751      | 0.31           |
| C 2 – O40 – O39 | 110.3823           | 110.5036      | 0.12           |
| C 3 – H21 – C 2 | 109.1507           | 109.1375      | 0.01           |
| C 3 – H22 – C 2 | 109.1139           | 108.9386      | 0.17           |
| C 3 – H22 – H21 | 109.2782           | 109.1269      | 0.15           |
| C 3 – H23 – C 2 | 111.0437           | 111.1368      | 0.09           |
| C 3 – H23 – H21 | 109.2600           | 109.4261      | 0.16           |
| C 3 – H23 – H22 | 108.9708           | 109.0460      | 0.07           |
| C 4 – O40 – C 5 | 116.5993           | 116.5423      | 0.05           |
| C 4 – O42 – C 5 | 125.3756           | 125.9873      | 0.61           |
| C 4 – O42 – O40 | 117.8349           | 117.3000      | 0.53           |
| C 5 – C 6 – C 4 | 121.3501           | 121.7211      | 0.37           |
| C 5 – C 7 – C 4 | 119.6842           | 119.6346      | 0.04           |
| C 5 – C 7 – C 6 | 118.2742           | 117.8781      | 0.39           |
| C 6 – O39 – C 5 | 116.8296           | 116.7904      | 0.03           |
| C 6 – O41 – C 5 | 124.7320           | 125.1606      | 0.42           |
| C 6 – O41 – O39 | 118.2761           | 117.8908      | 0.38           |
| C 7 – C 8 – C 5 | 115.2208           | 115.2590      | 0.03           |
| C 7 – C11 – C 5 | 116.1069           | 116.4059      | 0.29           |
| C 7 – C11 – C 8 | 102.0341           | 101.9155      | 0.11           |
| C 7 – H24 – C 5 | 107.6288           | 107.2389      | 0.38           |
| C 7 – H24 – C 8 | 105.8164           | 105.8730      | 0.05           |
| C 7 – H24 – C11 | 109.4905           | 109.6172      | 0.12           |
| C 8 – C 9 – C 7 | 107.6558           | 107.8968      | 0.24           |
| C 8 – O43 – C 7 | 125.6996           | 125.9126      | 0.21           |
| C 8 – O43 – C 9 | 126.6360           | 126.1784      | 0.45           |
| C 9 – C10 – C 8 | 110.0323           | 110.0391      | 0.00           |
| C 9 – H25 – C 8 | 122.8635           | 122.8615      | 0.00           |
| C 9 – H25 – C10 | 127.0891           | 127.0845      | 0.00           |
| C10 – C11 – C 9 | 111.2178           | 110.8952      | 0.32           |
| C10 – H26 – C 9 | 125.8462           | 125.7797      | 0.06           |
| C10 – H26 – C11 | 122.7465           | 123.0535      | 0.30           |
| C11 – C10 – C 7 | 105.8589           | 106.1661      | 0.30           |
| C11 – N17 – C 7 | 113.4057           | 113.3933      | 0.01           |
| C11 – N17 – C10 | 112.3750           | 112.5426      | 0.16           |
| C11 – H36 – C 7 | 108.7230           | 108.3445      | 0.37           |
| C11 – H36 – C10 | 109.5043           | 109.5014      | 0.00           |
| C11 – H36 – N17 | 106.9145           | 106.8111      | 0.10           |
| C12 – N17 – C13 | 112.2401           | 112.0752      | 0.16           |
| C12 – H27 – C13 | 113.0160           | 113.2684      | 0.25           |
| C12 – H27 – N17 | 106.0002           | 105.9454      | 0.05           |
| C12 – H28 – C13 | 111.2239           | 110.9976      | 0.22           |
| C12 – H28 – N17 | 105.2018           | 105.2824      | 0.08           |
| C12 – H28 – H27 | 108.7204           | 108.8357      | 0.11           |
| C13 – H29 – C12 | 112.1318           | 111.8915      | 0.24           |
| C13 – H30 – C12 | 108.3023           | 108.1658      | 0.13           |
| C13 – H30 – H29 | 107.6160           | 107.7530      | 0.13           |
| C13 – H31 – C12 | 111.8417           | 111.8644      | 0.02           |
| C13 – H31 – H29 | 109.2509           | 109.4787      | 0.22           |
| C13 – H31 – H30 | 107.4979           | 107.4961      | 0.00           |
| C14 – N17 – C15 | 110.4227           | 110.6959      | 0.27           |
| C14 – H32 – C15 | 110.5097           | 110.6160      | 0.10           |
| C14 – H32 – N17 | 107.8201           | 107.9900      | 0.16           |
| C14 – H33 – C15 | 112.3375           | 111.9169      | 0.42           |
| C14 – H33 – N17 | 107.2541           | 107.1216      | 0.13           |
| C14 – H33 – H32 | 108.3307           | 108.3443      | 0.01           |
| C15 – C16 – C14 | 112.8331           | 110.8760      | 1.95           |
| C15 – H34 – C14 | 112.0681           | 112.4281      | 0.35           |
| C15 – H34 – C16 | 106.3284           | 108.0509      | 1.72           |
| C15 – H35 – C14 | 111.4069           | 111.3019      | 0.10           |
| C15 – H35 – C16 | 107.2766           | 107.5332      | 0.25           |
| C15 – H35 – H34 | 106.5403           | 106.4064      | 0.13           |
| C16 – O44 – C15 | 115.3236           | 111.0443      | 4.27           |
| C16 – O45 – C15 | 117.1176           | 125.1810      | 8.06           |
| C16 – O45 – O44 | 127.5531           | 123.7738      | 3.77           |
| N17 – C12 – C11 | 112.9086           | 112.5349      | 0.37           |
| N17 – C14 – C11 | 113.0289           | 112.9458      | 0.08           |
| N17 – C14 – C12 | 110.9787           | 110.5172      | 0.46           |
| N17 – H37 – C11 | 105.5626           | 105.5940      | 0.03           |
| N17 – H37 – C12 | 106.7059           | 107.0399      | 0.33           |
| N17 – H37 – C14 | 107.1284           | 107.8004      | 0.67           |
| O39 – C 6 – C 2 | 115.5538           | 115.1130      | 0.44           |
| O40 – C 4 – C 2 | 116.0464           | 115.7722      | 0.27           |

TABLE 7 – Comparison between the angles of **1b** in the adsorbed and isolated states

| Angle           | Adsorbed-phase (°) | Gas-phase (°) | Difference (°) |
|-----------------|--------------------|---------------|----------------|
| C 1 – N19 – N18 | 116.6493           | 116.5921      | 0.05           |
| C 1 – O44 – N18 | 121.3672           | 121.3328      | 0.03           |
| C 1 – O44 – N19 | 121.9836           | 122.0753      | 0.09           |
| C 2 – N19 – C 3 | 118.3025           | 118.1901      | 0.11           |
| C 2 – O41 – C 3 | 125.0341           | 125.3486      | 0.31           |
| C 2 – O41 – N19 | 116.6635           | 116.4614      | 0.20           |
| C 3 – C 4 – C 2 | 119.3514           | 119.4919      | 0.14           |
| C 3 – C 5 – C 2 | 125.5226           | 125.4711      | 0.05           |
| C 3 – C 5 – C 4 | 115.1260           | 115.0371      | 0.08           |
| C 4 – N18 – C 3 | 116.6792           | 116.6574      | 0.02           |
| C 4 – O42 – C 3 | 123.5068           | 123.7482      | 0.24           |
| C 4 – O42 – N18 | 119.8141           | 119.5945      | 0.21           |
| C 5 – C 6 – C 3 | 133.4657           | 133.6173      | 0.15           |
| C 5 – H20 – C 3 | 112.2826           | 112.2572      | 0.02           |
| C 5 – H20 – C 6 | 114.2516           | 114.1255      | 0.12           |
| C 6 – C 7 – C 5 | 117.0580           | 116.7588      | 0.29           |
| C 6 – O43 – C 5 | 124.8777           | 125.1478      | 0.27           |
| C 6 – O43 – C 7 | 118.0641           | 118.0935      | 0.02           |
| C 7 – C 8 – C 6 | 124.5759           | 124.4154      | 0.16           |
| C 7 – H21 – C 6 | 116.4597           | 116.7615      | 0.30           |
| C 7 – H21 – C 8 | 118.9624           | 118.8232      | 0.13           |
| C 8 – C 9 – C 7 | 121.0485           | 120.8412      | 0.20           |
| C 8 – H22 – C 7 | 117.8021           | 117.7684      | 0.03           |
| C 8 – H22 – C 9 | 121.1444           | 121.3893      | 0.24           |
| C 9 – N17 – C 8 | 126.8062           | 127.1017      | 0.29           |
| C 9 – H23 – C 8 | 118.8508           | 118.8749      | 0.02           |
| C 9 – H23 – N17 | 114.3430           | 114.0220      | 0.32           |
| C10 – N17 – C11 | 112.4138           | 112.1100      | 0.30           |
| C10 – H24 – C11 | 110.5073           | 110.5526      | 0.04           |
| C10 – H24 – N17 | 107.2462           | 107.5220      | 0.27           |
| C10 – H25 – C11 | 110.6667           | 110.7839      | 0.11           |
| C10 – H25 – N17 | 108.4395           | 108.4715      | 0.03           |
| C10 – H25 – H24 | 107.3729           | 107.2153      | 0.15           |
| C11 – H26 – C10 | 110.9847           | 110.7832      | 0.20           |
| C11 – H27 – C10 | 109.6818           | 110.1564      | 0.47           |
| C11 – H27 – H26 | 108.2257           | 108.2337      | 0.00           |
| C11 – H28 – C10 | 110.8688           | 110.5076      | 0.36           |
| C11 – H28 – H26 | 108.6120           | 108.5497      | 0.06           |
| C11 – H28 – H27 | 108.3883           | 108.5400      | 0.15           |
| C12 – N17 – C13 | 111.1861           | 111.8132      | 0.62           |
| C12 – H29 – C13 | 109.9132           | 109.3320      | 0.58           |
| C12 – H29 – N17 | 108.6070           | 108.9850      | 0.37           |
| C12 – H30 – C13 | 110.1482           | 109.7652      | 0.38           |
| C12 – H30 – N17 | 108.8363           | 108.8924      | 0.05           |
| C12 – H30 – H29 | 108.0770           | 107.9700      | 0.10           |
| C13 – C16 – C12 | 110.5887           | 110.0341      | 0.55           |
| C13 – H31 – C12 | 109.3559           | 109.3402      | 0.01           |
| C13 – H31 – C16 | 109.1479           | 107.7161      | 1.43           |
| C13 – H32 – C12 | 108.6325           | 109.1999      | 0.56           |
| C13 – H32 – C16 | 109.0759           | 110.7411      | 1.66           |
| C13 – H32 – H31 | 110.0304           | 109.7858      | 0.24           |
| C14 – H34 – N18 | 109.5678           | 109.6132      | 0.04           |
| C14 – H35 – N18 | 109.5089           | 109.5506      | 0.04           |
| C14 – H35 – H34 | 108.2461           | 108.2376      | 0.00           |
| C14 – H36 – N18 | 107.2668           | 107.1729      | 0.09           |
| C14 – H36 – H34 | 111.0788           | 111.0781      | 0.00           |
| C14 – H36 – H35 | 111.1578           | 111.1758      | 0.01           |
| C15 – H37 – N19 | 107.5435           | 107.5346      | 0.00           |
| C15 – H38 – N19 | 109.4492           | 109.4806      | 0.03           |
| C15 – H38 – H37 | 111.0022           | 111.0248      | 0.02           |
| C15 – H39 – N19 | 109.4347           | 109.4631      | 0.02           |
| C15 – H39 – H37 | 111.0238           | 111.0637      | 0.03           |
| C15 – H39 – H38 | 108.3686           | 108.2577      | 0.11           |
| C16 – O45 – C13 | 116.1769           | 112.0316      | 4.14           |
| C16 – O46 – C13 | 117.4975           | 125.2202      | 7.72           |
| C16 – O46 – O45 | 126.2748           | 122.6836      | 3.59           |
| N17 – C10 – C 9 | 121.4035           | 121.8612      | 0.45           |
| N17 – C12 – C 9 | 121.0890           | 120.6467      | 0.44           |
| N17 – C12 – C10 | 117.4523           | 117.4918      | 0.03           |
| N18 – C 4 – C 1 | 124.7973           | 124.7991      | 0.00           |
| N18 – C14 – C 1 | 115.7709           | 115.8433      | 0.07           |
| N18 – C14 – C 4 | 119.4318           | 119.3576      | 0.07           |
| N19 – C 2 – C 1 | 124.2198           | 124.2689      | 0.04           |
| N19 – C15 – C 1 | 117.9919           | 118.1105      | 0.11           |
| N19 – C15 – C 2 | 117.7883           | 117.6207      | 0.16           |
| O43 – H33 – C 6 | 107.9607           | 107.7747      | 0.18           |

TABLE 8 – Comparison between the angles of **2b** in the adsorbed and isolated states

| Angle           | Adsorbed-phase (°) | Gas-phase (°) | Difference (°) |
|-----------------|--------------------|---------------|----------------|
| C 1 – N19 – N18 | 117.1647           | 117.0628      | 0.10           |
| C 1 – O44 – N18 | 121.4641           | 121.5235      | 0.05           |
| C 1 – O44 – N19 | 121.3546           | 121.3983      | 0.04           |
| C 2 – N19 – C 3 | 116.0323           | 115.9145      | 0.11           |
| C 2 – O42 – C 3 | 123.7280           | 124.2988      | 0.57           |
| C 2 – O42 – N19 | 120.1917           | 119.7471      | 0.44           |
| C 3 – C 4 – C 2 | 122.7217           | 123.0409      | 0.31           |
| C 3 – C 5 – C 2 | 119.7335           | 119.6863      | 0.04           |
| C 3 – C 5 – C 4 | 117.4746           | 117.2199      | 0.25           |
| C 4 – N18 – C 3 | 116.3705           | 116.3592      | 0.01           |
| C 4 – O41 – C 3 | 122.7161           | 123.1069      | 0.39           |
| C 4 – O41 – N18 | 120.8943           | 120.5103      | 0.38           |
| C 5 – C 6 – C 3 | 115.4986           | 115.5124      | 0.01           |
| C 5 – C 9 – C 3 | 115.4561           | 115.6944      | 0.23           |
| C 5 – C 9 – C 6 | 102.2669           | 102.1593      | 0.10           |
| C 5 – H20 – C 3 | 107.2763           | 106.9171      | 0.35           |
| C 5 – H20 – C 6 | 105.9847           | 106.1900      | 0.20           |
| C 5 – H20 – C 9 | 109.9274           | 109.9607      | 0.03           |
| C 6 – C 7 – C 5 | 107.6418           | 107.8297      | 0.18           |
| C 6 – O43 – C 5 | 125.8155           | 126.1536      | 0.33           |
| C 6 – O43 – C 7 | 126.4793           | 125.9324      | 0.54           |
| C 7 – C 8 – C 6 | 110.2678           | 110.2796      | 0.01           |
| C 7 – H21 – C 6 | 122.5619           | 122.6588      | 0.09           |
| C 7 – H21 – C 8 | 127.1624           | 127.0583      | 0.10           |
| C 8 – C 9 – C 7 | 111.0887           | 110.8177      | 0.27           |
| C 8 – H22 – C 7 | 125.8226           | 125.9204      | 0.09           |
| C 8 – H22 – C 9 | 122.8284           | 122.9800      | 0.15           |
| C 9 – C 8 – C 5 | 106.0872           | 106.4295      | 0.34           |
| C 9 – N17 – C 5 | 112.7430           | 113.0850      | 0.34           |
| C 9 – N17 – C 8 | 112.7170           | 112.3279      | 0.38           |
| C 9 – H32 – C 5 | 109.4144           | 109.1258      | 0.28           |
| C 9 – H32 – C 8 | 109.4644           | 109.6262      | 0.16           |
| C 9 – H32 – N17 | 106.3954           | 106.2200      | 0.17           |
| C10 – N17 – C11 | 112.6972           | 112.1480      | 0.54           |
| C10 – H23 – C11 | 113.2896           | 113.0735      | 0.21           |
| C10 – H23 – N17 | 105.7263           | 106.0092      | 0.28           |
| C10 – H24 – C11 | 110.7327           | 110.8857      | 0.15           |
| C10 – H24 – N17 | 105.5347           | 105.3602      | 0.17           |
| C10 – H24 – H23 | 108.4189           | 108.9571      | 0.53           |
| C11 – H25 – C10 | 111.9781           | 111.5803      | 0.39           |
| C11 – H26 – C10 | 108.0814           | 108.2756      | 0.19           |
| C11 – H26 – H25 | 107.8318           | 107.8088      | 0.02           |
| C11 – H27 – C10 | 111.8954           | 111.9832      | 0.08           |
| C11 – H27 – H25 | 109.4392           | 109.5746      | 0.13           |
| C11 – H27 – H26 | 107.4185           | 107.4343      | 0.01           |
| C12 – N17 – C13 | 110.2764           | 110.6884      | 0.41           |
| C12 – H28 – C13 | 111.1113           | 110.6645      | 0.44           |
| C12 – H28 – N17 | 108.0830           | 108.0074      | 0.07           |
| C12 – H29 – C13 | 111.6566           | 111.8886      | 0.23           |
| C12 – H29 – N17 | 107.0502           | 107.1498      | 0.09           |
| C12 – H29 – H28 | 108.5076           | 108.2856      | 0.22           |
| C13 – C16 – C12 | 112.4832           | 110.8478      | 1.63           |
| C13 – H30 – C12 | 112.9418           | 112.4880      | 0.45           |
| C13 – H30 – C16 | 107.3792           | 108.0130      | 0.63           |
| C13 – H31 – C12 | 111.0772           | 111.3069      | 0.22           |
| C13 – H31 – C16 | 106.0232           | 107.5351      | 1.51           |
| C13 – H31 – H30 | 106.5045           | 106.4033      | 0.10           |
| C14 – H34 – N18 | 110.0337           | 110.0808      | 0.04           |
| C14 – H35 – N18 | 109.5369           | 109.6884      | 0.15           |
| C14 – H35 – H34 | 108.1065           | 107.8579      | 0.24           |
| C14 – H36 – N18 | 107.1536           | 107.1886      | 0.03           |
| C14 – H36 – H34 | 110.8519           | 110.9056      | 0.05           |
| C14 – H36 – H35 | 111.1580           | 111.1270      | 0.03           |
| C15 – H37 – N19 | 109.5364           | 109.6315      | 0.09           |
| C15 – H38 – N19 | 109.9876           | 110.1249      | 0.13           |
| C15 – H38 – H37 | 108.0040           | 107.8109      | 0.19           |
| C15 – H39 – N19 | 107.2488           | 107.1800      | 0.06           |
| C15 – H39 – H37 | 111.1469           | 111.1410      | 0.00           |
| C15 – H39 – H38 | 110.9174           | 110.9603      | 0.04           |
| C16 – O45 – C13 | 114.9212           | 111.0628      | 3.85           |
| C16 – O46 – C13 | 117.2463           | 125.1210      | 7.87           |
| C16 – O46 – O45 | 127.8195           | 123.8157      | 4.00           |
| N17 – C10 – C 9 | 112.5449           | 112.4941      | 0.05           |
| N17 – C12 – C 9 | 113.2382           | 113.0625      | 0.17           |
| N17 – C12 – C10 | 109.7166           | 110.4360      | 0.71           |
| N17 – H33 – C 9 | 105.9240           | 105.5559      | 0.36           |
| N17 – H33 – C10 | 107.3977           | 107.1742      | 0.22           |
| N17 – H33 – C12 | 107.6679           | 107.7118      | 0.04           |
| N18 – C 4 – C 1 | 123.5005           | 123.4027      | 0.09           |
| N18 – C14 – C 1 | 116.6319           | 116.4861      | 0.14           |
| N18 – C14 – C 4 | 119.8648           | 120.1086      | 0.24           |
| N19 – C 2 – C 1 | 123.7942           | 123.8090      | 0.01           |
| N19 – C15 – C 1 | 116.3091           | 116.1454      | 0.16           |
| N19 – C15 – C 2 | 119.8945           | 120.0443      | 0.14           |



## Molecular orbitals

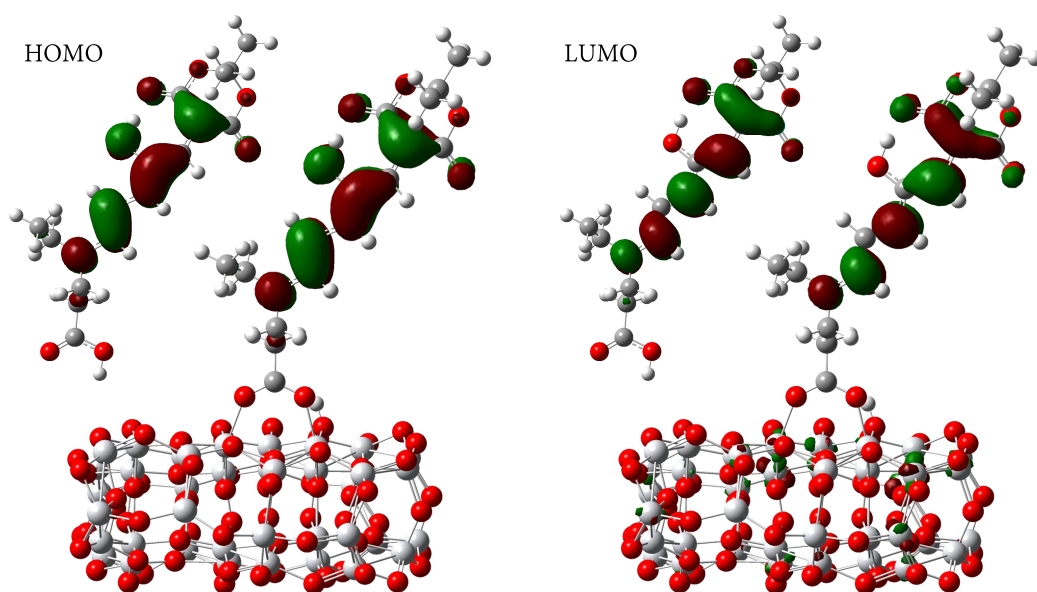

FIGURE 1 – Electronic density of the HOMO and LUMO of **1a** in the gas and adsorbed phases, obtained with the CAM-B3LYP functional. An isovalue of  $0.03 \text{ e}/\text{\AA}^3$  is used to plot the isosurfaces.

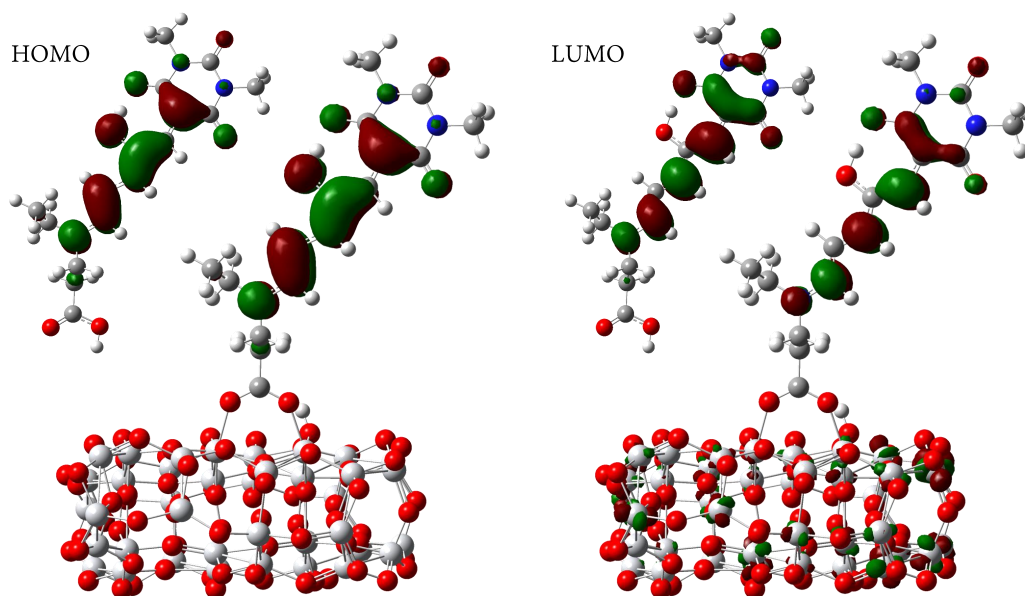

FIGURE 2 – Electronic density of the HOMO and LUMO of **1b** in the gas and adsorbed phases, obtained with the CAM-B3LYP functional. An isovalue of  $0.03 \text{ e}/\text{\AA}^3$  is used to plot the isosurfaces.

TABLE 9 – CAM-B3LYP/6-31G(d) optimized structure of the bare TiO<sub>2</sub> finite cluster

| Atom | x (Å)     | y (Å)     | z (Å)     |
|------|-----------|-----------|-----------|
| O    | 0.475673  | -1.421381 | 1.412151  |
| O    | 2.648592  | -3.306103 | 4.004443  |
| Ti   | -0.267332 | -5.356090 | 2.338208  |
| O    | -1.442554 | -4.493593 | 0.797034  |
| O    | 0.124414  | -3.581967 | 2.633464  |
| Ti   | 1.720898  | -2.386764 | 2.710754  |
| Ti   | -0.683080 | -2.718296 | 0.821834  |
| Ti   | -2.788779 | -5.650069 | 1.027544  |
| O    | 1.056658  | -5.611238 | 0.926652  |
| O    | -1.916624 | -6.141190 | 2.545348  |
| O    | 0.855563  | -6.492764 | 3.188946  |
| O    | 2.749336  | -2.860730 | -2.080360 |
| Ti   | 1.465666  | -4.022590 | -1.924709 |
| O    | 2.953222  | -3.043500 | 1.623302  |
| O    | 2.267439  | -5.754843 | -1.749200 |
| O    | 5.519217  | -3.180473 | 3.136604  |
| O    | -2.996599 | 2.903237  | -0.016236 |
| O    | -0.080650 | 1.190207  | 2.105456  |
| Ti   | -3.196290 | -0.962905 | 0.509632  |
| O    | -4.808068 | 0.085047  | -0.496921 |
| O    | -4.135883 | -2.319521 | -0.505674 |
| Ti   | -5.016095 | -3.869364 | -0.578089 |
| Ti   | -5.642570 | -1.249084 | -1.530955 |
| Ti   | -3.757256 | 1.588646  | -1.117449 |
| O    | -2.349417 | 0.481286  | 0.068013  |
| O    | -2.312255 | -2.033800 | 1.890562  |
| O    | 0.163055  | 1.262603  | -3.761756 |
| O    | 2.550442  | -0.241395 | -3.069605 |
| O    | 0.112751  | 1.126568  | -0.292385 |
| O    | 2.070559  | -0.497409 | -0.638808 |
| Ti   | -0.798289 | -2.381182 | -2.116032 |
| O    | -2.042542 | -1.107332 | -4.719399 |
| O    | -2.424129 | -3.080041 | -2.817745 |
| Ti   | -3.165449 | -4.685901 | -3.281515 |
| Ti   | -3.435823 | -2.110408 | -4.439657 |
| Ti   | -1.421867 | 0.544195  | -3.914785 |
| O    | 0.303393  | -3.455931 | -3.143653 |
| O    | -1.726281 | -1.936929 | -0.405863 |
| O    | -0.443300 | -0.718179 | -2.473567 |
| O    | 0.399120  | -3.054525 | -0.699210 |
| Ti   | 3.887729  | 0.172391  | 2.747180  |
| O    | 2.650873  | 1.404883  | 1.288432  |
| Ti   | 1.171146  | 0.326313  | 0.969177  |
| O    | 2.243152  | -0.621456 | 2.908041  |
| O    | 4.917445  | -0.576197 | 3.860860  |
| Ti   | 5.855125  | 2.854968  | 2.581585  |
| O    | 4.967118  | 4.101281  | 1.777276  |
| Ti   | 3.280152  | 3.141541  | 1.374301  |
| O    | 6.678595  | 1.585635  | 1.392102  |
| O    | 4.348696  | 2.020251  | 2.989737  |
| O    | 7.410227  | 2.616415  | 3.560197  |
| Ti   | 5.905570  | -1.050388 | -0.214185 |
| O    | 4.814524  | 0.355425  | -1.331518 |
| O    | 7.524822  | -0.097015 | -0.730899 |
| Ti   | 7.868006  | 1.453178  | -0.132656 |
| Ti   | 5.205095  | 2.107082  | -1.576088 |
| Ti   | 3.330129  | -1.130131 | -1.719604 |
| O    | 4.906109  | -0.616518 | 1.399668  |
| O    | 5.002422  | -2.110954 | -1.156324 |
| O    | 6.851957  | -2.031650 | 1.036823  |
| O    | 7.614930  | -0.408130 | 3.141267  |
| Ti   | 6.173474  | -1.557073 | 2.598429  |
| Ti   | 8.109562  | 1.203782  | 2.659453  |
| Ti   | 0.918231  | 4.571014  | 1.266898  |
| O    | -1.808638 | 6.193885  | 0.390671  |
| O    | -0.700759 | 3.697799  | 0.863194  |
| Ti   | -1.166956 | 1.844560  | 0.924089  |
| Ti   | -2.303172 | 4.542055  | -0.429195 |
| Ti   | -0.380077 | 7.103895  | 0.073543  |
| O    | 0.802106  | 6.396485  | 1.241738  |
| O    | 2.024754  | 3.905797  | 2.489323  |
| Ti   | 2.940043  | 3.678160  | -1.921732 |
| O    | 1.709366  | 4.448751  | -3.211952 |
| O    | 1.942827  | 2.167497  | -1.889423 |
| Ti   | 1.166369  | 0.650523  | -2.292915 |
| Ti   | 1.830015  | 6.058890  | -2.644029 |
| O    | 4.342151  | 3.030028  | -2.863935 |
| O    | 2.071778  | 4.015340  | 0.061060  |
| O    | 3.196389  | 5.671685  | -1.687893 |
| O    | 4.200352  | 2.944260  | -0.390460 |
| O    | 3.674271  | -5.704912 | 2.504924  |
| Ti   | 2.209479  | -6.612884 | 1.965476  |
| Ti   | 3.910259  | -3.942610 | 2.898937  |
| Ti   | 1.281279  | -6.774467 | -0.734945 |
| O    | -4.522615 | -4.732508 | -2.051757 |
| O    | -4.441830 | -4.837747 | 0.850132  |
| O    | -2.492580 | -6.813010 | -0.284040 |
| Ti   | -1.306673 | -6.799255 | -1.701281 |
| O    | -0.212686 | -5.535301 | -1.298354 |
| O    | 0.078756  | -7.951882 | -1.483477 |
| O    | 2.283624  | -7.712689 | 0.580587  |
| O    | -6.462112 | -2.785029 | -1.000729 |
| O    | -2.183373 | -6.180209 | -3.209225 |
| O    | -3.652036 | -3.928027 | -4.808635 |
| O    | 6.978283  | 2.537596  | -1.245411 |
| O    | 9.162748  | 1.452766  | 1.221913  |
| O    | -0.661512 | 8.564822  | -1.029090 |
| O    | 1.069545  | 7.633427  | -3.486598 |
| O    | 0.238465  | 6.318531  | -1.512381 |
| O    | -1.859536 | 6.863995  | -3.372489 |
| Ti   | -0.458013 | 7.715666  | -2.630116 |
| O    | -3.594849 | 5.359501  | -1.443871 |
| O    | -1.505470 | 4.311643  | -2.003067 |
| O    | -3.470987 | 4.105791  | -4.120876 |
| Ti   | -2.701034 | 5.264314  | -2.975236 |
| O    | -4.711882 | 2.493864  | -2.180323 |
| O    | -2.360732 | 1.659364  | -4.976163 |
| O    | -2.649291 | 1.240771  | -2.606469 |
| Ti   | -5.597462 | -0.316831 | -4.209656 |
| O    | -5.104580 | 1.331600  | -4.573894 |
| Ti   | -3.683964 | 2.313063  | -3.922903 |
| O    | -6.742881 | -0.565774 | -2.779790 |
| O    | -4.910414 | -1.452551 | -5.382186 |
| O    | -4.378678 | -1.139352 | -3.016535 |
